# Supplementary material for: The structure–function relationship between multifocal pupil perimetry and retinal nerve fibre layer in glaucoma
Source: Springer Nature journal article supplement (doi:10.1186/s12886-024-03402-z), 2024-04-10
Supplement: MOESM1 [file 26963434]

**mfPOP test-regions**

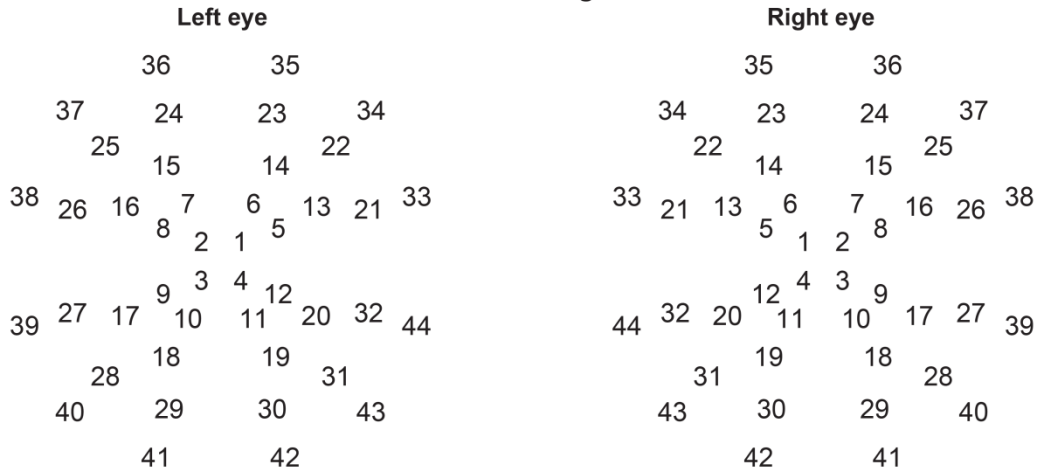

**HFA test-points**

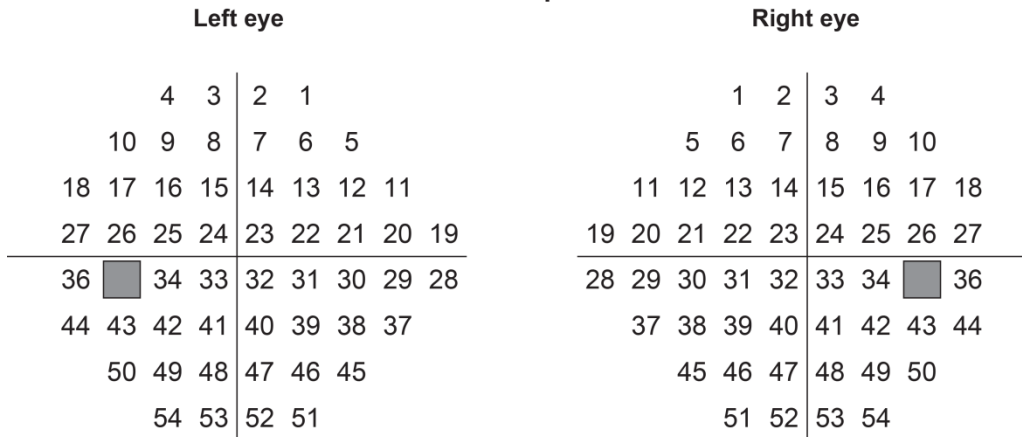

**RNFL clock-hour sectors**

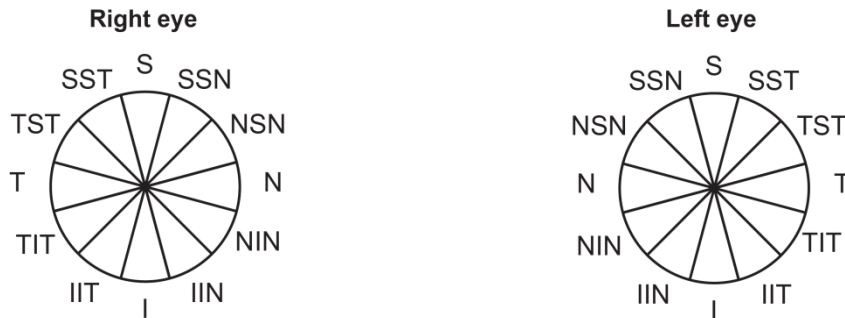

S – superior, SSN – superior superonasal, NSN – nasal superonasal, N – nasal, NIN – nasal inferonasal, IIN – inferior inferonasal, I – inferior, IIT – inferior inferotemporal, TIT – temporal inferotemporal, T – temporal, TST – temporal superotemporal, SST – superior superotemporal

**Supplementary Figure S1.** Numbering of mfPOP test-regions and HFA test-points, and labelling of RNFL clock-hour sectors used in Supplementary Tables S1 and S2.
