# Supplementary material for: The structure–function relationship between multifocal pupil perimetry and retinal nerve fibre layer in glaucoma
Source: Springer Nature journal article supplement (doi:10.1186/s12886-024-03402-z), 2024-04-10
Supplement: MOESM2 [file 26963434]

**Supplementary Table S1.** Weighting of mfPOP test-regions according to their contribution to retinal arcuate divisions corresponding to Stratus OCT sectors.

| MfPOP test-region* | Test-region ring: central→peripheral | RNFL clock-hour sector* |      |      |      |     |     |      |      |      |      |      |      |
|--------------------|--------------------------------------|-------------------------|------|------|------|-----|-----|------|------|------|------|------|------|
|                    |                                      | S                       | SSN  | NSN  | N    | NIN | IIN | I    | IIT  | TIT  | T    | TST  | SST  |
| 1                  | 1                                    | 0                       | 0    | 0    | 0    | 0   | 0   | 0    | 0    | 1    | 0    | 0    | 0    |
| 2                  |                                      | 0                       | 0    | 0    | 0    | 0   | 0   | 0    | 0    | 1    | 0    | 0    | 0    |
| 3                  |                                      | 0                       | 0    | 0    | 0    | 0   | 0   | 0    | 0    | 0    | 0.75 | 0.25 | 0    |
| 4                  |                                      | 0                       | 0    | 0    | 0    | 0   | 0   | 0    | 0    | 0    | 0.25 | 0.75 | 0    |
| 5                  | 2                                    | 0                       | 0    | 0    | 0    | 0   | 0   | 0    | 0.66 | 0.34 | 0    | 0    | 0    |
| 6                  |                                      | 0                       | 0    | 0    | 0    | 0   | 0   | 0    | 0.8  | 0.2  | 0    | 0    | 0    |
| 7                  |                                      | 0                       | 0    | 0    | 0    | 0   | 0   | 0    | 0.75 | 0.25 | 0    | 0    | 0    |
| 8                  |                                      | 0                       | 0    | 0    | 0    | 0   | 0   | 0    | 0.25 | 0.75 | 0    | 0    | 0    |
| 9                  |                                      | 0                       | 0    | 0    | 0    | 0   | 0   | 0    | 0    | 0    | 0.5  | 0.5  | 0    |
| 10                 |                                      | 0                       | 0    | 0    | 0    | 0   | 0   | 0    | 0    | 0    | 0.05 | 0.7  | 0.25 |
| 11                 |                                      | 0                       | 0    | 0    | 0    | 0   | 0   | 0    | 0    | 0    | 0    | 0.4  | 0.6  |
| 12                 |                                      | 0                       | 0    | 0    | 0    | 0   | 0   | 0    | 0    | 0    | 0    | 0.35 | 0.65 |
| 13                 | 3                                    | 0                       | 0    | 0    | 0    | 0   | 0   | 0.1  | 0.8  | 0.1  | 0    | 0    | 0    |
| 14                 |                                      | 0                       | 0    | 0    | 0    | 0   | 0   | 0.4  | 0.6  | 0    | 0    | 0    | 0    |
| 15                 |                                      | 0                       | 0    | 0    | 0    | 0   | 0   | 0.45 | 0.5  | 0.05 | 0    | 0    | 0    |
| 16                 |                                      | 0                       | 0    | 0    | 0    | 0   | 0.1 | 0.3  | 0.25 | 0.35 | 0    | 0    | 0    |
| 17                 |                                      | 0.2                     | 0    | 0    | 0    | 0   | 0   | 0    | 0    | 0    | 0.3  | 0.3  | 0.2  |
| 18                 |                                      | 0.3                     | 0    | 0    | 0    | 0   | 0   | 0    | 0    | 0    | 0    | 0.3  | 0.4  |
| 19                 |                                      | 0.05                    | 0    | 0    | 0    | 0   | 0   | 0    | 0    | 0    | 0    | 0.15 | 0.8  |
| 20                 |                                      | 0                       | 0    | 0    | 0    | 0   | 0   | 0    | 0    | 0    | 0    | 0.1  | 0.9  |
| 21                 | 4                                    | 0                       | 0    | 0    | 0    | 0   | 0   | 0.45 | 0.55 | 0    | 0    | 0    | 0    |
| 22                 |                                      | 0                       | 0    | 0    | 0    | 0   | 0   | 0.75 | 0.25 | 0    | 0    | 0    | 0    |
| 23                 |                                      | 0                       | 0    | 0    | 0    | 0   | 0   | 0.8  | 0.2  | 0    | 0    | 0    | 0    |
| 24                 |                                      | 0                       | 0    | 0    | 0    | 0   | 0.1 | 0.8  | 0.1  | 0    | 0    | 0    | 0    |
| 25                 |                                      | 0                       | 0    | 0    | 0    | 0   | 0.5 | 0.4  | 0.1  | 0    | 0    | 0    | 0    |
| 26                 |                                      | 0                       | 0    | 0    | 0    | 0.3 | 0.4 | 0.2  | 0.1  | 0    | 0    | 0    | 0    |
| 27                 |                                      | 0.15                    | 0.3  | 0.2  | 0.25 | 0   | 0   | 0    | 0    | 0    | 0    | 0    | 0.1  |
| 28                 |                                      | 0.6                     | 0.25 | 0    | 0    | 0   | 0   | 0    | 0    | 0    | 0    | 0    | 0.15 |
| 29                 |                                      | 0.75                    | 0    | 0    | 0    | 0   | 0   | 0    | 0    | 0    | 0    | 0    | 0.25 |
| 30                 |                                      | 0.4                     | 0    | 0    | 0    | 0   | 0   | 0    | 0    | 0    | 0    | 0    | 0.6  |
| 31                 |                                      | 0                       | 0    | 0    | 0    | 0   | 0   | 0    | 0    | 0    | 0    | 0    | 1    |
| 32                 |                                      | 0                       | 0    | 0    | 0    | 0   | 0   | 0    | 0    | 0    | 0    | 0    | 1    |
| 33                 | 5                                    | 0                       | 0    | 0    | 0    | 0   | 0   | 0.9  | 0.1  | 0    | 0    | 0    | 0    |
| 34                 |                                      | 0                       | 0    | 0    | 0    | 0   | 0   | 1    | 0    | 0    | 0    | 0    | 0    |
| 35                 |                                      | 0                       | 0    | 0    | 0    | 0   | 0.1 | 0.9  | 0    | 0    | 0    | 0    | 0    |
| 36                 |                                      | 0                       | 0    | 0    | 0    | 0   | 0.5 | 0.5  | 0    | 0    | 0    | 0    | 0    |
| 37                 |                                      | 0                       | 0    | 0    | 0    | 0.1 | 0.8 | 0.1  | 0    | 0    | 0    | 0    | 0    |
| 38                 |                                      | 0                       | 0    | 0    | 0.1  | 0.7 | 0.2 | 0    | 0    | 0    | 0    | 0    | 0    |
| 39                 |                                      | 0                       | 0.2  | 0.45 | 0.35 | 0   | 0   | 0    | 0    | 0    | 0    | 0    | 0    |
| 40                 |                                      | 0.2                     | 0.7  | 0.1  | 0    | 0   | 0   | 0    | 0    | 0    | 0    | 0    | 0    |
| 41                 |                                      | 0.8                     | 0.2  | 0    | 0    | 0   | 0   | 0    | 0    | 0    | 0    | 0    | 0    |
| 42                 |                                      | 0.85                    | 0    | 0    | 0    | 0   | 0   | 0    | 0    | 0    | 0    | 0    | 0.15 |
| 43                 |                                      | 0.2                     | 0    | 0    | 0    | 0   | 0   | 0    | 0    | 0    | 0    | 0    | 0.8  |
| 44                 |                                      | 0                       | 0    | 0    | 0    | 0   | 0   | 0    | 0    | 0    | 0    | 0    | 1    |

\*Refer Supplementary Figure S1 for test-region and RNFL sector locations.

**Abbreviations:** RNFL - retinal nerve fiber layer, S – superior, SSN – superior superonasal, NSN – nasal superonasal, N – nasal, NIN – nasal inferonasal, IIN – inferior inferonasal, I – inferior, IIT – inferior inferotemporal, TIT – temporal inferotemporal, T – temporal, TST – temporal superotemporal, SST – superior superotemporal
