# Supplementary material for: The structure–function relationship between multifocal pupil perimetry and retinal nerve fibre layer in glaucoma
Source: Springer Nature journal article supplement (doi:10.1186/s12886-024-03402-z), 2024-04-10
Supplement: MOESM3 [file 26963434]

**Supplementary Table S2.** Weighting of HFA test points according to their contribution to retinal arcuate divisions corresponding to Stratus OCT sectors.

| HFA test-point* | Row S → I | Column N → T | RNFL clock-hour sector* |     |      |      |     |     |      |      |     |   |     |      |      |   |
|-----------------|-----------|--------------|-------------------------|-----|------|------|-----|-----|------|------|-----|---|-----|------|------|---|
|                 |           |              | S                       | SSN | NSN  | N    | NIN | IIN | I    | IIT  | TIT | T | TST | SST  |      |   |
| 1               | 1         | 4            | 0                       | 0   | 0    | 0    | 0   | 0   | 0    | 1    | 0   | 0 | 0   | 0    | 0    |   |
| 2               |           | 5            | 0                       | 0   | 0    | 0    | 0   | 0   | 0    | 1    | 0   | 0 | 0   | 0    | 0    |   |
| 3               |           | 6            | 0                       | 0   | 0    | 0    | 0   | 0   | 0    | 1    | 0   | 0 | 0   | 0    | 0    |   |
| 4               |           | 7            | 0                       | 0   | 0    | 0    | 0   | 0   | 0    | 1    | 0   | 0 | 0   | 0    | 0    |   |
| 5               | 2         | 3            | 0                       | 0   | 0    | 0    | 0   | 0   | 0    | 1    | 0   | 0 | 0   | 0    | 0    |   |
| 6               |           | 4            | 0                       | 0   | 0    | 0    | 0   | 0   | 0    | 1    | 0   | 0 | 0   | 0    | 0    |   |
| 7               |           | 5            | 0                       | 0   | 0    | 0    | 0   | 0   | 0    | 1    | 0   | 0 | 0   | 0    | 0    |   |
| 8               |           | 6            | 0                       | 0   | 0    | 0    | 0   | 0   | 0    | 1    | 0   | 0 | 0   | 0    | 0    |   |
| 9               |           | 7            | 0                       | 0   | 0    | 0    | 0   | 0   | 0    | 1    | 0   | 0 | 0   | 0    | 0    |   |
| 10              |           | 8            | 0                       | 0   | 0    | 0    | 0   | 0   | 0    | 1    | 0   | 0 | 0   | 0    | 0    |   |
| 11              | 3         | 2            | 0                       | 0   | 0    | 0    | 0   | 0   | 0    | 1    | 0   | 0 | 0   | 0    | 0    |   |
| 12              |           | 3            | 0                       | 0   | 0    | 0    | 0   | 0   | 0    | 1    | 0   | 0 | 0   | 0    | 0    |   |
| 13              |           | 4            | 0                       | 0   | 0    | 0    | 0   | 0   | 0    | 0    | 1   | 0 | 0   | 0    | 0    |   |
| 14              |           | 5            | 0                       | 0   | 0    | 0    | 0   | 0   | 0    | 0    | 1   | 0 | 0   | 0    | 0    |   |
| 15              |           | 6            | 0                       | 0   | 0    | 0    | 0   | 0   | 0    | 0    | 1   | 0 | 0   | 0    | 0    |   |
| 16              |           | 7            | 0                       | 0   | 0    | 0    | 0   | 0   | 0    | 0    | 1   | 0 | 0   | 0    | 0    |   |
| 17              |           | 8            | 0                       | 0   | 0    | 0    | 0   | 0   | 0.25 | 0.75 | 0   | 0 | 0   | 0    | 0    |   |
| 18              |           | 9            | 0                       | 0   | 0    | 0    | 0   | 0   | 1    | 0    | 0   | 0 | 0   | 0    | 0    |   |
| 19              | 4         | 1            | 0                       | 0   | 0    | 0    | 0   | 0   | 0    | 1    | 0   | 0 | 0   | 0    | 0    |   |
| 20              |           | 2            | 0                       | 0   | 0    | 0    | 0   | 0   | 0    | 1    | 0   | 0 | 0   | 0    | 0    |   |
| 21              |           | 3            | 0                       | 0   | 0    | 0    | 0   | 0   | 0    | 0    | 1   | 0 | 0   | 0    | 0    |   |
| 22              |           | 4            | 0                       | 0   | 0    | 0    | 0   | 0   | 0    | 0    | 1   | 0 | 0   | 0    | 0    |   |
| 23              |           | 5            | 0                       | 0   | 0    | 0    | 0   | 0   | 0    | 0    | 0   | 1 | 0   | 0    | 0    |   |
| 24              |           | 6            | 0                       | 0   | 0    | 0    | 0   | 0   | 0    | 0    | 0   | 1 | 0   | 0    | 0    |   |
| 25              |           | 7            | 0                       | 0   | 0    | 0    | 0   | 0   | 0    | 0    | 0   | 1 | 0   | 0    | 0    |   |
| 26              |           | 8            | 0                       | 0   | 0    | 0    | 0   | 0   | 0    | 1    | 0   | 0 | 0   | 0    | 0    |   |
| 27              |           | 9            | 0                       | 0   | 0    | 0    | 0   | 1   | 0    | 0    | 0   | 0 | 0   | 0    | 0    |   |
| 28              | 5         | 1            | 0                       | 0   | 0    | 0    | 0   | 0   | 0    | 0    | 0   | 0 | 0   | 0    | 1    |   |
| 29              |           | 2            | 0                       | 0   | 0    | 0    | 0   | 0   | 0    | 0    | 0   | 0 | 0   | 0    | 1    |   |
| 30              |           | 3            | 0                       | 0   | 0    | 0    | 0   | 0   | 0    | 0    | 0   | 0 | 0   | 0    | 1    |   |
| 31              |           | 4            | 0                       | 0   | 0    | 0    | 0   | 0   | 0    | 0    | 0   | 0 | 0   | 0    | 1    |   |
| 32              |           | 5            | 0                       | 0   | 0    | 0    | 0   | 0   | 0    | 0    | 0   | 0 | 0   | 1    | 0    |   |
| 33              |           | 6            | 0                       | 0   | 0    | 0    | 0   | 0   | 0    | 0    | 0   | 0 | 1   | 0    | 0    |   |
| 34              |           | 7            | 0                       | 0   | 0    | 0    | 0   | 0   | 0    | 0    | 0   | 0 | 0   | 0.75 | 0.25 | 0 |
| 35              |           | 8            |                         |     |      |      |     |     |      |      |     |   |     |      |      |   |
| 36              |           | 9            | 0                       | 0   | 0.25 | 0.75 | 0   | 0   | 0    | 0    | 0   | 0 | 0   | 0    | 0    | 0 |
| 37              | 6         | 2            | 0                       | 0   | 0    | 0    | 0   | 0   | 0    | 0    | 0   | 0 | 0   | 0    | 1    |   |
| 38              |           | 3            | 0                       | 0   | 0    | 0    | 0   | 0   | 0    | 0    | 0   | 0 | 0   | 0    | 1    |   |
| 39              |           | 4            | 0                       | 0   | 0    | 0    | 0   | 0   | 0    | 0    | 0   | 0 | 0   | 0    | 1    |   |
| 40              |           | 5            | 0                       | 0   | 0    | 0    | 0   | 0   | 0    | 0    | 0   | 0 | 0   | 0    | 1    |   |
| 41              |           | 6            | 0                       | 0   | 0    | 0    | 0   | 0   | 0    | 0    | 0   | 0 | 0   | 1    | 0    |   |
| 42              |           | 7            | 0                       | 0   | 0    | 0    | 0   | 0   | 0    | 0    | 0   | 0 | 0   | 0    | 1    |   |
| 43              |           | 8            | 1                       | 0   | 0    | 0    | 0   | 0   | 0    | 0    | 0   | 0 | 0   | 0    | 0    | 0 |
| 44              |           | 9            | 0                       | 0.5 | 0.5  | 0    | 0   | 0   | 0    | 0    | 0   | 0 | 0   | 0    | 0    | 0 |
| 45              |           | 7            | 3                       | 0   | 0    | 0    | 0   | 0   | 0    | 0    | 0   | 0 | 0   | 0    | 0    | 1 |
| 46              | 4         |              | 0                       | 0   | 0    | 0    | 0   | 0   | 0    | 0    | 0   | 0 | 0   | 0    | 1    |   |
| 47              | 5         |              | 0                       | 0   | 0    | 0    | 0   | 0   | 0    | 0    | 0   | 0 | 0   | 0    | 1    |   |
| 48              | 6         |              | 0                       | 0   | 0    | 0    | 0   | 0   | 0    | 0    | 0   | 0 | 0   | 0    | 1    |   |
| 49              | 7         |              | 1                       | 0   | 0    | 0    | 0   | 0   | 0    | 0    | 0   | 0 | 0   | 0    | 0    | 0 |
| 50              | 8         |              | 0                       | 1   | 0    | 0    | 0   | 0   | 0    | 0    | 0   | 0 | 0   | 0    | 0    | 0 |
| 51              | 8         |              | 4                       | 1   | 0    | 0    | 0   | 0   | 0    | 0    | 0   | 0 | 0   | 0    | 0    | 0 |
| 52              |           | 5            | 1                       | 0   | 0    | 0    | 0   | 0   | 0    | 0    | 0   | 0 | 0   | 0    | 0    |   |
| 53              |           | 6            | 1                       | 0   | 0    | 0    | 0   | 0   | 0    | 0    | 0   | 0 | 0   | 0    | 0    |   |
| 54              |           | 7            | 1                       | 0   | 0    | 0    | 0   | 0   | 0    | 0    | 0   | 0 | 0   | 0    | 0    | 0 |

\*Refer Supplementary Figure S1 for test-point and RNFL sector locations.

**Abbreviations:** RNFL - retinal nerve fiber layer, S – superior, SSN – superior superonasal, NSN – nasal superonasal, N – nasal, NIN – nasal inferonasal, IIN – inferior inferonasal, I – inferior, IIT – inferior inferotemporal, TIT – temporal inferotemporal, T – temporal, TST – temporal superotemporal, SST – superior superotemporal
